# Supplementary material for: Diversity and Molecular Barcoding of Stink Bugs (Hemiptera: Pentatomidae) Associated with Macadamia in South Africa
Source: MDPI journal article supplement (doi:10.3390/insects13070601), 2022-06-30
Supplement: s1 [file s1]

**Table S1.** Number of stink bug morphospecies found at each location across three seasons.

[illegible]

**Table S2.** Seasonal presence of stink bug species per scout batch per region.

|                                   | 2017-2018 |      | 2018-2019 |      | 2019-2020 |      |               |      |            |      |
|-----------------------------------|-----------|------|-----------|------|-----------|------|---------------|------|------------|------|
|                                   | Limpopo   |      | Limpopo   |      | Limpopo   |      | KwaZulu-Natal |      | Mpumalanga |      |
| Stink bug species                 | Early     | Late | Early     | Late | Early     | Late | Early         | Late | Early      | Late |
| <i>Agonoscelis versicoloratus</i> | 1         |      |           | 3    |           |      | 2             |      |            |      |
| <i>Anolcus campestris</i>         |           |      |           | 4    |           |      | 2             |      |            |      |
| <i>Antestia</i> sp.               | 1         |      |           | 6    |           |      |               | 1    |            | 2    |
| <i>Antestiopsis thunbergii</i>    |           |      |           | 1    |           |      |               |      |            |      |
| <i>Aspavia albidomaculata</i>     |           |      |           |      |           |      | 1             | 8    |            |      |
| <i>Basicryptus costalis</i>       |           |      |           |      |           |      |               | 3    |            |      |
| <i>Bathypoelia distincta</i>      | 5         | 13   |           | 43   | 35        | 15   | 53            | 40   | 11         | 12   |
| <i>Boerias</i> sp. 1              |           |      |           |      |           |      | 22            | 51   |            |      |
| <i>Boerias</i> sp. 2              |           |      |           |      |           |      | 13            | 24   |            |      |
| <i>Carbula recurva</i>            | 1         |      |           | 3    |           |      | 1             | 8    |            |      |
| <i>Caura rufiventris</i>          | 1         |      |           | 3    | 1         |      |               |      |            |      |
| <i>Chinavia pallidoconspersa</i>  | 1         | 4    |           | 7    | 5         | 1    | 9             | 5    | 5          | 11   |
| <i>Coenomorpha nervosa</i>        |           |      |           |      |           |      | 3             | 5    |            |      |
| <i>Macrorhaphis acuta</i>         | 1         |      |           |      |           |      | 2             | 1    |            |      |
| <i>Nezara viridula</i>            | 13        | 17   |           | 11   | 26        | 5    | 14            | 7    | 2          | 12   |
| <i>Parachinavia prunasis</i>      | 2         | 7    |           | 4    | 23        |      | 5             | 1    | 7          |      |
| <i>Parantestia</i> sp.            | 9         | 1    |           | 15   | 10        |      | 21            | 14   | 8          | 4    |
| <i>Piezodorus</i> sp.             | 9         | 2    |           | 3    | 24        |      | 6             |      | 6          |      |
| <i>Platacantha lutea</i>          |           |      |           |      |           |      | 1             |      |            |      |
| <i>Pseudatelus raptorius</i>      |           |      |           | 2    | 2         |      | 10            | 14   |            |      |
| <i>Tripanda signitenens</i>       |           |      |           | 3    |           |      | 5             | 2    |            |      |
| Total scout batches               | 37        |      | 42        |      | 55        |      | 172           |      | 36         |      |
|                                   | 342       |      |           |      |           |      |               |      |            |      |

**Table S3.** Collection details of specimens sequenced to determine species presence and composition of stink bugs in macadamia orchards in South Africa.

| Sample code | Sub family   | Tribe            | Morphological identification                     | Date collected | Location        | SANC voucher numbers |
|-------------|--------------|------------------|--------------------------------------------------|----------------|-----------------|----------------------|
| MSL67       | Pentatominae | Agonoscelidini   | <i>Agonoscelis versicoloratus</i> (Turton, 1802) | 11/2/2019      | Limpopo 1       | PENT00039            |
| MSL68       |              |                  |                                                  | 26/2/2019      | Limpopo 1       | PENT00006            |
| MSL69       | Pentatominae | Halyini          | <i>Anolcus campestris</i> Bergroth, 1893         | 14/2/2019      | Limpopo 1       | PENT00040            |
| MSL70       |              |                  |                                                  | 5/3/2019       | Limpopo 1       | PENT00032            |
| MSM46       | Pentatominae | Antestiini       | <i>Antestia</i> sp. Stål, 1865                   | 10/3/2020      | Mpumalanga 1    | PENT00041            |
| MSL71       |              |                  |                                                  | 31/10/2017     | Limpopo 1       | PENT00035            |
| MSK47       | Pentatominae | Antestiini       | <i>Antestiopsis thunbergii</i> (Gmelin, 1790)    | 25/09/2019     | KwaZulu-Natal 1 | PENT00042            |
| MSK48       |              |                  |                                                  | 27/11/2019     | KwaZulu-Natal 2 | PENT00031            |
| MSK49       | Pentatominae | Eysarcorini      | <i>Aspavia albidomaculata</i> (Stål, 1853)       | 10/4/2020      | KwaZulu-Natal 2 | PENT00034            |
| MSK50       |              |                  |                                                  | 20/5/2020      | KwaZulu-Natal 2 | PENT00043            |
| MSK51       | Pentatominae | Phyllocephalinae | <i>Basicryptus costalis</i> (Germar, 1838)       | 21/4/2020      | KwaZulu-Natal 1 | PENT00044            |
| MSK52       |              |                  |                                                  | 19/7/2019      | KwaZulu-Natal 2 | PENT00007            |
| MSL72       | Pentatominae | Bathycoeliini    | <i>Bathycoelia distincta</i> Distant, 1878       | 26/11/2019     | Limpopo 1       | PENT00026            |
| MSL73       |              |                  |                                                  | 31/10/2017     | Limpopo 1       | PENT00027            |
| MSL74       |              |                  |                                                  | 31/10/2017     | Limpopo 1       | PENT00028            |

|       |              |              |                                               |            |                 |           |
|-------|--------------|--------------|-----------------------------------------------|------------|-----------------|-----------|
| MSL75 |              |              |                                               | 18/04/18   | Limpopo 2       | PENT00029 |
| MSK53 |              |              |                                               | 24/9/2019  | KwaZulu-Natal 1 | PENT00030 |
| MSK54 | Pentatominae | Cappaeni     | <i>Boerias</i> sp. 1                          | 11/7/2019  | KwaZulu-Natal 1 | PENT00011 |
| MSK55 |              |              |                                               | 5/9/2019   | KwaZulu-Natal 2 | PENT00045 |
| MSK56 |              |              |                                               | 13/7/2019  | KwaZulu-Natal 1 | PENT00046 |
| MSK57 |              |              |                                               | 13/7/2019  | KwaZulu-Natal 1 | PENT00008 |
| MSK58 | Pentatominae | Cappaeni     | <i>Boerias</i> sp. 2                          | 16/1/2020  | KwaZulu-Natal 1 | PENT00012 |
| MSK59 |              |              |                                               | 11/3/2020  | KwaZulu-Natal 1 | PENT00009 |
| MSK60 | Pentatominae | Eyasarcorini | <i>Carbula recurva</i> Distant, 1915          | 5/12/2019  | KwaZulu-Natal 2 | PENT00033 |
| MSK61 |              |              |                                               | 15/4/2020  | KwaZulu-Natal 2 | PENT00047 |
| MSL76 | Pentatominae | Cappaeni     | <i>Caura rufiventris</i> (Germar, 1838)       | 26/2/2019  | Limpopo 1       | PENT00048 |
| MSL77 |              |              |                                               | 19/02/2019 | Limpopo 1       | PENT00013 |
| MSK62 | Pentatominae | Nezarini     | <i>Chinavia pallidoconspersa</i> (Stål, 1858) | 20/7/2019  | KwaZulu-Natal 1 | PENT00014 |
| MSM47 |              |              |                                               | 11/5/2020  | Mpumalanga 1    | PENT00049 |
| MSK63 |              |              |                                               | 3/6/2020   | KwaZulu-Natal 2 | PENT00050 |
| MSL78 |              |              |                                               | 20/8/2019  | Limpopo 1       | PENT00051 |
| MSK64 | Pentatominae | Halyini      | <i>Coenomorpha nervosa</i> Dallas, 1851       | 20/5/2020  | KwaZulu-Natal 1 | PENT00015 |
| MSM48 |              |              |                                               | 12/3/2020  | Mpumalanga 2    | PENT00052 |
| MSK65 | Asopinae     | -            | <i>Macrorhaphis acuta</i> Dallas, 1851        | 12/6/2020  | KwaZulu-Natal 1 | PENT00018 |

|       |              |             |                                             |           |                 |           |
|-------|--------------|-------------|---------------------------------------------|-----------|-----------------|-----------|
| MSL79 |              |             |                                             | 25/7/2017 | Limpopo 1       | PENT00053 |
| MSM49 | Pentatominae | Nezarini    | <i>Nezara viridula</i> (Linnaeus, 1758)     | 11/5/2020 | Mpumalanga 1    | PENT00054 |
| MSL80 |              |             |                                             | 04/2019   | Limpopo 2       | PENT00055 |
| MSM50 |              |             |                                             | 12/3/2020 | Mpumalanga 2    | PENT00056 |
| MSK66 |              |             |                                             | 10/7/2019 | KwaZulu-Natal 2 | PENT00057 |
| MSL81 |              |             |                                             | 25/7/2017 | Limpopo 1       | PENT00020 |
| MSL82 |              |             |                                             | 25/7/2017 | Limpopo 1       | PENT00019 |
| MSM51 | Pentatominae | Nezarini    | <i>Parachinavia prunasis</i> (Dallas, 1851) | 16/4/2020 | Mpumalanga 1    | PENT00036 |
| MSM52 |              |             |                                             | 4/6/2020  | Mpumalanga 1    | PENT00037 |
| MSL83 |              |             |                                             | 19/9/2017 | Limpopo 1       | PENT00058 |
| MSL84 |              |             |                                             | 01/2019   | Limpopo 2       | PENT00059 |
| MSL85 | Pentatominae | Antestiini  | <i>Parantestia</i> sp. (Linnavuori, 1973)   | 12/2/2019 | Limpopo 1       | PENT00025 |
| MSL86 |              |             |                                             | 18/04/18  | Limpopo 2       | PENT00060 |
| MSM53 |              |             |                                             | 20/06/06  | Mpumalanga 1    | PENT00061 |
| MSK67 |              |             |                                             | 30/4/2020 | KwaZulu-Natal 1 | PENT00062 |
| MSK68 |              |             |                                             | 20/3/2020 | KwaZulu-Natal 2 | PENT00063 |
| MSL87 | Pentatominae | Piezodorini | <i>Piezodorus</i> sp. (Fieber, 1860)        | 18/04/18  | Limpopo 2       | PENT00022 |
| MSL88 |              |             |                                             | 5/9/2017  | Limpopo 1       | PENT00021 |
| MSM54 |              |             |                                             | 6/6/2019  | Mpumalanga 1    | PENT00064 |

|       |              |               |                                             |           |                 |           |
|-------|--------------|---------------|---------------------------------------------|-----------|-----------------|-----------|
| MSL89 | Pentatominae | Eurysaspidini | <i>Platacantha lutea</i> (Westwood, 1837)   | 5/3/2019  | Limpopo 1       | PENT00065 |
| MSM55 |              |               |                                             | 12/3/2020 | Mpumalanga 2    | PENT00023 |
| MSK71 | Pentatominae | Halyini       | <i>Pseudatelus raptorius</i> (Germar, 1838) | 24/4/2020 | KwaZulu-Natal 1 | PENT00024 |
| MSK72 |              |               |                                             | 5/6/2020  | KwaZulu-Natal 1 | PENT00066 |
| MSM56 |              |               |                                             | 12/3/2020 | Mpumalanga 2    | PENT00067 |
| MSM57 |              |               |                                             | 12/3/2020 | Mpumalanga 2    | PENT00068 |
| MSK73 | Pentatominae | Cappaeni      | <i>Tripanda signitenens</i> (Distant, 1898) | 6/8/2019  | KwaZulu-Natal 1 | PENT00069 |
| MSK74 |              |               |                                             | 6/3/2020  | KwaZulu-Natal 2 | PENT00038 |
